# Supplementary material for: Embryonic Stage of Congenital Zika Virus Infection Determines Fetal and Postnatal Outcomes in Mice
Source: MDPI journal article supplement (doi:10.3390/v13091807), 2021-09-11
Supplement: s1 [file s1]

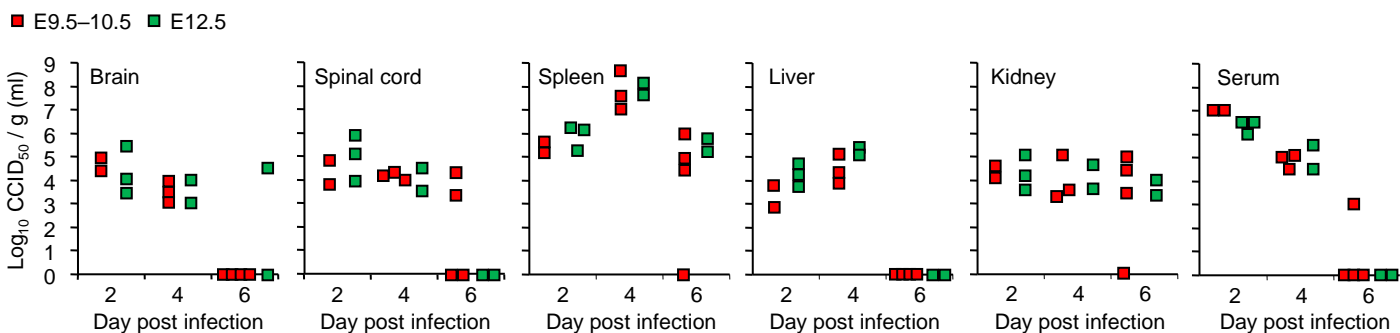

**Supplemental Figure S1. Virus titers in maternal tissues.** Pregnant IFN $\alpha/\beta$  receptor knockout (IFNAR<sup>-/-</sup>) mice were infected with Zika virus (ZIKV) PRVABC59 at embryonic day 9.5 (E9.5)–E10.5 (red square) or E12.5 (green square) and their tissues harvested 2, 4, or 6 days post infection (dpi). Viral titers were determined using the 50% cell culture infective dose (CCID<sub>50</sub>) assay. Statistical analysis was performed using two-way ANOVA.

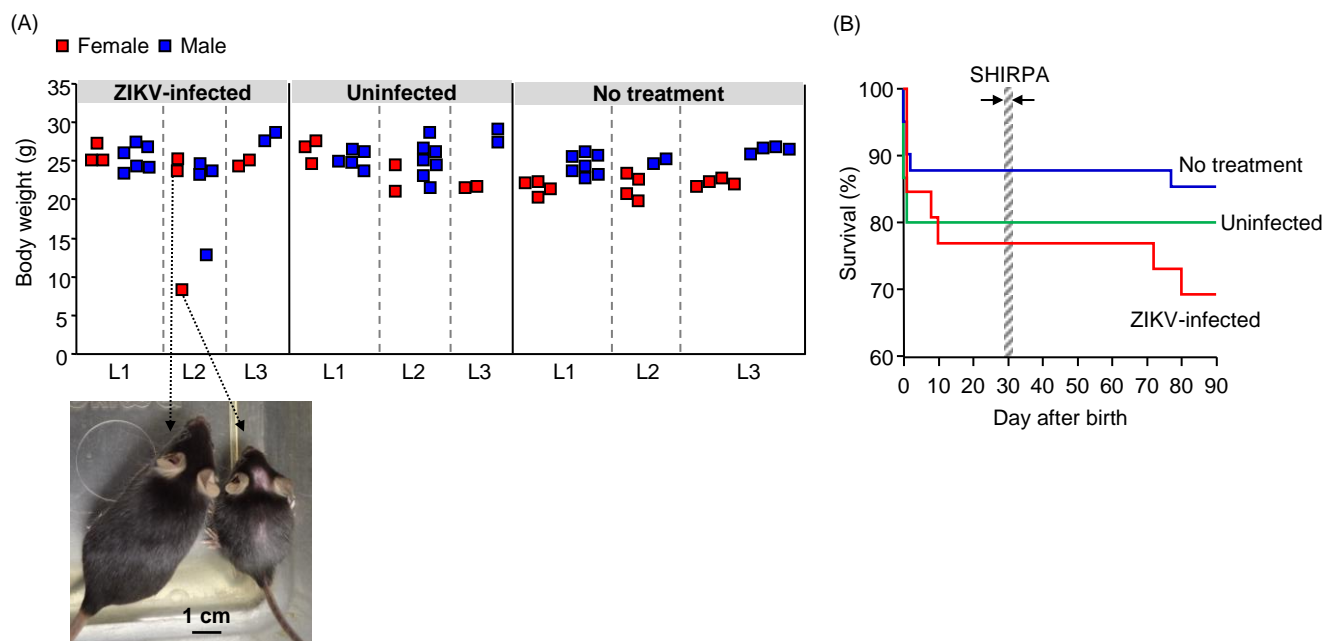

**Supplemental Figure S2. Offspring infected at E12.5 in adulthood.** (A) Reduced weight of infected offspring at 10 weeks after birth. Dams were infected subcutaneously (s.c.) with PRVABC59 at E12.5 (ZIKV-infected), inoculated s.c. with 2MEM at E12.5 (uninfected), or not treated throughout pregnancy and the postnatal period (no treatment). Offspring weight was measured 10 weeks after birth. Individual litters are indicated on the x-axis; each square represents a single offspring. Vertical dashed grey lines separate each litter. Dorsal view of smaller female offspring compared with that of female littermate. (B) Survival over 90 days after birth. SHIRPA was performed on offspring at 29–31 days of age (4-week-old), as indicated by the shaded area. The log-rank test was used for the statistical analysis of survival rates.



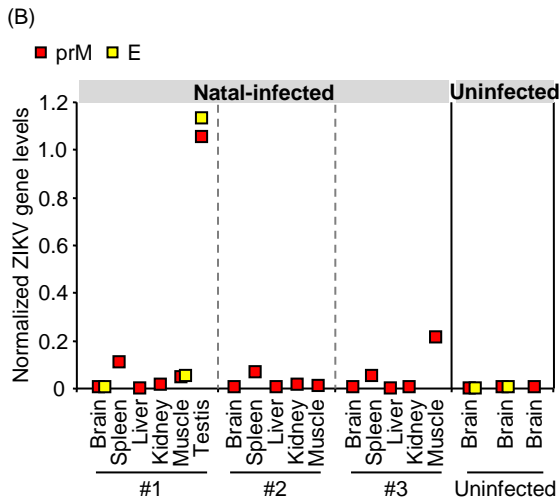

**Supplemental Figure S3. Offspring outcomes after ZIKV Natal RGN infection.** (A) SHIRPA results for offspring born to dams Natal RGN-infected (n = 6 litters) or uninfected (n = 1 litter) at 3 weeks post-birth. Pregnant IFNAR<sup>-/-</sup> dams crossed with IFNAR<sup>-/-</sup> males were infected subcutaneously (s.c.) with  $1 \times 10^4$  CCID<sub>50</sub> of Natal RGN at E6.5 or E12.5, as previously described [26, 41, 42]. IFNAR<sup>-/-</sup> mice on a C57BL/6J background were provided by P. Hertzog (Monash University, Melbourne, VIC, Australia) [77]. Each histogram represents a single SHIRPA protocol test. Each bar represents a single offspring with red bars indicating mice born to Natal RGN-infected dams and blue bars indicating mice born to dams inoculated with RPMI1640 (Thermo Fisher Scientific, Inc., Waltham, MA, USA) containing 2% FBS. Longer lines along the y-axis separate the litters. Yellow boxes are used to highlight tests where the observably abnormal offspring performed significantly different from the offspring born to uninfected dams. The green box represents where other mice born to Natal RGN-infected dams performed significantly different to the mice born to uninfected dams. Some offspring did not undergo certain tests, as indicated by the “not tested” label. \*\*,  $p < 0.01$ ; \*,  $p < 0.05$ . T-test with unequal variance or Kolmogorov-Smirnov test was used for statistical analysis. (B) ZIKV RNA levels in the offspring tissues. ZIKV RNA levels in the indicated tissues of offspring born to Natal RGN-infected dams at E6.5 determined by qRT-PCR with ZIKV prM or E gene-specific primers. ZIKV RNA levels were normalized to RPL13 mRNA levels. The vertical dashed gray lines represent each offspring. Three brains from uninfected mice were used to determine the detection limit.

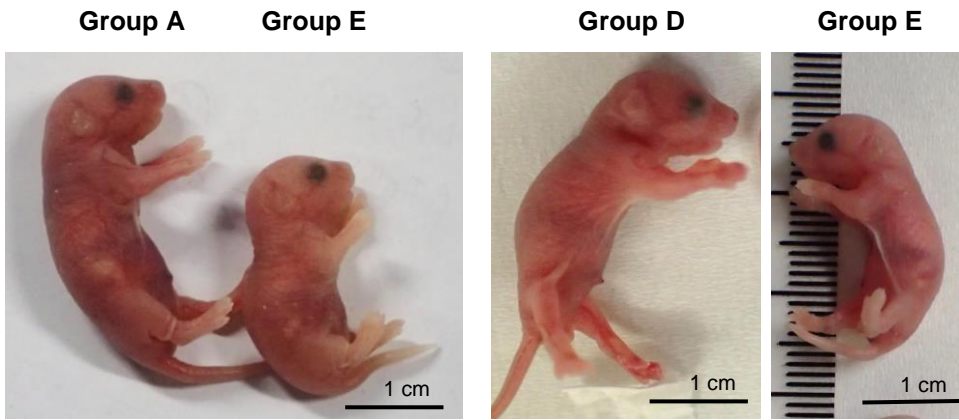

**Supplemental Figure S4. Size of one-day-old offspring.** Dams in Groups A and D had neutralizing antibodies before ZIKV challenge at E9.5, as shown in Figure 4A. Dams in Group E did not have neutralizing antibodies before ZIKV challenge at E9.5. The size of one-day-old offspring in Groups A and D was visually bigger than that in Group E. Representative offspring from each group are shown.

**Supplemental Table S1.** Mouse pregnancy models.

| Dam                                     | Sire                                    | Inoculation dose                                            | Virus strain     | Route of infection                         | Infection | Inspection  | Offspring outcomes                                                                  | Ref  |
|-----------------------------------------|-----------------------------------------|-------------------------------------------------------------|------------------|--------------------------------------------|-----------|-------------|-------------------------------------------------------------------------------------|------|
| ICR                                     | ICR                                     | $6.5 \times 10^3$ PFU                                       | SZ01             | Cerebroventricular space/LV of feral brain | E13.5     | E16.5/18.5  | Microcephaly, fetal brain infection                                                 | [33] |
| ICR                                     | ICR                                     | $6.5 \times 10^3$ PFU                                       | VEN/2016         | LV of feral brain                          | E13.5     | E18.5       | Microcephaly, fetal brain infection                                                 | [34] |
| Swiss                                   | Swiss                                   | $5-10 \times 10^2$ PFU                                      | Senegal_2015     | intraplacental                             | E10.5     | E18.5       | Fetal resorption, fetal death                                                       | [73] |
|                                         |                                         |                                                             | Philippines_2012 | intraplacental                             | E10.5     | E18.5       | Reduced fetal head weight                                                           |      |
|                                         |                                         |                                                             | Thailand_2014    | intraplacental                             | E10.5     | E18.5       | Reduced fetal head/brain weight                                                     |      |
| C57BL/6                                 | C57BL/6                                 | $3.4 \times 10^5$ , $1 \times 10^5$ , $3.4 \times 10^4$ PFU | PRVABC59         | Retrobulbar                                | E9.5      | E17.5       | Fetal demise, fetal resorption, IUGR, neonatal death                                | [64] |
| C57BL/6                                 | C57BL/6                                 | $1.5 \times 10^5$ PFU                                       | FSS13025         | IVAG                                       | E4.5      | E18.5       | Fetal growth defect, fetal brain infection                                          | [28] |
|                                         |                                         |                                                             |                  |                                            | E8.5      | E18.5       | No fetal growth defect but fetal brain infection                                    |      |
| Irf3 <sup>-/-</sup> Irf7 <sup>-/-</sup> | Irf3 <sup>-/-</sup> Irf7 <sup>-/-</sup> | $1.5 \times 10^5$ PFU                                       | FSS13025         | IVAG                                       | E4.5      | E18.5       | Reduced fetal weight, fetal body infection                                          |      |
|                                         |                                         |                                                             |                  |                                            | E8.5      | E18.5       | No fetal growth defect but fetal body infection                                     |      |
| IFNAR <sup>-/-</sup>                    | C57BL/6                                 | $1.5 \times 10^5$ PFU                                       | FSS13025         | IVAG                                       | E4.5      | E12.5       | Fetal resorption                                                                    |      |
|                                         |                                         |                                                             |                  |                                            | E8.5      | E18.5       | Reduced fetal weight, fetal body infection                                          |      |
| IFNAR <sup>-/-</sup>                    | C57BL/6                                 | $10^3$ PFU                                                  | H/PF/2013        | SC                                         | E6.5/E7.5 | E13.5,E15.5 | Spontaneous abortion, fetal demise, IUGR, fetal head infection                      | [29] |
| C57BL/6 + $\alpha$ -ifnar1-Ab           | C57BL/6                                 | $10^3$ PFU                                                  | H/PF/2013        | SC                                         | E6.5/E7.5 | E13.5,E15.5 | IUGR, fetal head infection                                                          |      |
| IFNAR <sup>-/-</sup>                    | C57BL/6                                 | $10^3$ PFU                                                  | PRVABC59         | SC                                         | E7.5      | E14.5       | Fetal resorption, mild IUGR, fetal infection                                        | [37] |
|                                         |                                         |                                                             | DAKAR41524       | SC                                         | E7.5      | E14.5       | Fetal resorption, fetal infection                                                   |      |
| IFNAR <sup>-/-</sup>                    | IFNAR <sup>-/-</sup>                    | $10^{3,4,5,6}$ CCID <sub>50</sub>                           | Natal RGN        | SC                                         | E6.5      | E17.5/E18.5 | IUGR, deformed fetal/placental mass, abortion, fetal head infection                 | [26] |
|                                         |                                         |                                                             |                  |                                            | E12.5     | E17.5/E18.5 | Deformed fetal/placental mass, abortion, fetal head infection                       |      |
| IFNAR <sup>-/-</sup>                    | IFNAR <sup>-/-</sup>                    | $10^4$ CCID <sub>50</sub>                                   | P6-740           | SC                                         | E12.5     | E17.5       | Deformed fetal/placental mass, fetal head infection,                                | [41] |
| C57BL/6                                 | C57BL/6                                 | $\sim 3.4 \times 10^2$ TCID <sub>50</sub>                   | MEX1-44          | LV of fetal brain                          | E14.5     | E18.5       | Fetal brain infection                                                               | [32] |
|                                         |                                         |                                                             |                  |                                            |           | P5          | Reduced fetal body size, reduced fetal brain size and weight, Neonatal death by P10 |      |
|                                         |                                         | $\sim 3.4 \times 10^2$ TCID <sub>50</sub>                   | MR766            | LV of fetal brain                          | E14.5     | E18.5       | Reduced brain size                                                                  |      |
|                                         |                                         |                                                             |                  |                                            |           | P0          | Neonatal death at P0/P1, reduced brain size                                         |      |
| C57BL/6                                 | C57BL/6                                 | $1.7 \times 10^3$ TCID <sub>50</sub>                        | MEX1-44          | LV of fetal brain                          | E14.5     | E17.5       | Fetal brain infection                                                               | [31] |
|                                         |                                         |                                                             |                  |                                            |           | P3          | Microcephaly, growth restriction of offspring                                       |      |
| C57BL/6                                 | C57BL/6                                 | $4.5 \times 10^2$ PFU                                       | SZ01             | IP                                         | E13.5     | E17.5/P1    | Fetal brain infection, fetal brain development↓                                     | [36] |

|                                     |               |                                                               |                            |             |            |                        |                                                                                                                            |      |
|-------------------------------------|---------------|---------------------------------------------------------------|----------------------------|-------------|------------|------------------------|----------------------------------------------------------------------------------------------------------------------------|------|
| C57BL/6                             | BALB/c        | $2.5 \times 10^7$ or $15 \times 10^5$<br>TCID <sub>50</sub>   | FB-GWUH-2016               | Retrobulbar | E3.5       | E17.5                  | Fetal loss, reduced fetal weight                                                                                           | [27] |
|                                     |               |                                                               |                            |             | E12.5      | E17.5                  | No outcome                                                                                                                 |      |
|                                     |               |                                                               |                            |             | E3.5       | adulthood              | Reduced survival, learning and memory impairments in male offspring                                                        |      |
| SJL                                 | SJL           | $1 \times 10^3$ , $4 \times 10^{10}$ , $1 \times 10^{12}$ PFU | Brazilian clinical isolate | IV          | E10.5–13.5 | P0                     | IUGR, microcephaly, ocular abnormality, offspring brain infection                                                          | [74] |
| C57BL/6                             | C57BL/6       | $1 \times 10^3$ , $4 \times 10^{10}$ , $1 \times 10^{12}$ PFU | Brazilian clinical isolate | IV          | E10.5–13.5 | P0                     | No outcome, no offspring infection                                                                                         |      |
| C57BL/6                             | C57BL/6       | $5 \times 10^2$ PFU                                           | SZ01                       | IA          | E15.5      | P0/P8                  | Offspring brain infection and reduced brain size                                                                           | [35] |
|                                     |               |                                                               |                            |             |            | P40                    | Visual and motor deficits, reduced body weight and brain volume                                                            |      |
| C57BL/6                             | C57BL/6       | $10^4$ PFU                                                    | PRVABC59                   | IP          | E8.5       | P0–P120                | No apparent defects at birth but growth impediment and neurobehavioral deficits (reduced locomotor and cognitive deficits) | [75] |
| Swiss-Webster + $\alpha$ -ifnar1-Ab | Swiss-Webster | $10^4$ PFU                                                    | HN16                       | SC          | E4.5       | 1–6 weeks after birth  | Small head size but normal brain weight of female offspring                                                                | [30] |
|                                     |               |                                                               |                            |             | E8.5       |                        | Small head size but normal brain weight of male/female offspring, growth restriction of male offspring                     |      |
|                                     |               |                                                               |                            |             | E12.5      |                        | No outcome                                                                                                                 |      |
| AG129                               | AG129         | $1 \times 10^2$ CCID <sub>50</sub>                            | P6-740                     | SC          | E7.5       | E17.5, E19.5           | Fetal brain infection, IUGR                                                                                                | [76] |
|                                     |               |                                                               |                            |             |            | P0–P45                 | Reduced body weight and head length, higher mortality by P35                                                               |      |
|                                     |               |                                                               |                            |             |            | 8–16 weeks after birth | Healing loss                                                                                                               |      |

Ref., reference; LV, lateral ventricle; E, embryonic day; IUGR, intrauterine growth restriction; IVAG, intravaginal; SC, subcutaneous; Ab, antibody; P, days after birth; IP, intraperitoneal; IV, intravenous; IA, intraamniotic.
